# Supplementary material for: Analysis of Heme and Non-Heme Iron Intake and Iron Dietary Sources in Adolescent Menstruating Females in a National Polish Sample
Source: PubMed Central journal article supplement (PMC6567869; doi:10.3390/nu11051049), 2019-05-10
Supplement: nutrients-11-01049-s001.pdf [file nutrients-11-01049-s001.pdf]

Article

# Analysis of Heme and Non-Heme Iron Intake and Iron Dietary Sources in Adolescent Menstruating Females in a National Polish Sample

Dominika Skolmowska and Dominika Głowska

**Supplementary Material S1.** Detailed methodology of the recruitment procedure.

The main phase included:

- Random selection of 5 counties out of each of the 16 voivodeships (80 counties were randomly selected out of 380 counties in Poland);
- Random selection of 5 secondary schools out of each of the 80 counties (400 secondary schools were randomly selected out of 14,009 secondary schools in Poland).

After the main phase, the principal of each randomly selected secondary school received a letter with invitation to participate and an e-mail with all necessary additional information, such as detailed aims of the study and its course. After two weeks, they received additional reminders to determine whether their schools (i.e., students from their schools) were interested to participate in the study. After confirmation, they received a written informed consent form, which was to be gathered from students and their parents/legal guardians for minors. Then, they received a link to the electronic version of the questionnaire with an access code that was generated for those students who provided written informed consent.

After one month of data gathering, the distribution of participants was analyzed and evaluated and the subsidiary phase of the sampling procedure was conducted. The subsidiary phase included:

- For voivodeships with less than 50 respondents gathered (9 voivodeships): Random selection of 10 counties out of each of the 9 voivodeships (90 counties were randomly selected);
- For voivodeships with more than 50 respondents gathered (7 voivodeships): Random selection of 5 counties out of each of the 7 voivodeships (35 counties were randomly selected);
- Random selection of 5 secondary schools out of each of the 125 counties (625 secondary schools were randomly selected).

After the subsidiary phase, similar to the main phase, the principal of each randomly selected secondary school received a letter with invitation to participate and an e-mail with all necessary additional information. After two weeks, a reminder was also issued. If the school's participations for the study is confirmed, they received a written informed consent form and a link to an electronic version of the questionnaire. Moreover, an access code was generated for the school's students. After this stage, data were gathered for six weeks.

After the whole procedure, 2514 participants completed the questionnaire with no missing data, which were assessed after considering previously established inclusion and exclusion criteria. The necessary information was gathered using written forms provided by students and their parents/legal guardians for minors, as well as using a brief online questionnaire (general characteristics such as sociodemographic data).

**Supplementary Table S1.** Comparison of the intake of various forms of iron along with that of iron intake from various sources in the national sample of Polish male adolescents, in the sub-groups of minor and adult male respondents.

| Intake of iron                      |                     | Minor male respondents ( <i>n</i> = 722) |                    |                       | Adult male respondents ( <i>n</i> = 303) |                    |                       | <i>p</i> -Value ** |
|-------------------------------------|---------------------|------------------------------------------|--------------------|-----------------------|------------------------------------------|--------------------|-----------------------|--------------------|
|                                     |                     | Intake (%)                               | Mean ± SD          | Median (25th–75th)    | Intake (%)                               | Mean ± SD          | Median (25th–75th)    |                    |
| Intake of various forms of iron     | Total iron (mg)     | 100                                      | 17.91 ± 9.28       | 15.59 (11.20–23.00) * | 100                                      | 17.06 ± 9.01       | 15.26 (10.19–21.89) * | 0.180              |
|                                     | Heme-iron (mg)      | 17.5                                     | 3.14 ± 2.23        | 2.54 (1.54–4.19) *    | 16.2                                     | 2.76 ± 1.97        | 2.17 (1.40–3.85) *    | 0.014              |
|                                     | Non-heme iron (mg)  | 82.5                                     | 14.77 ± 7.65       | 12.85 (9.24–4.06) *   | 83.8                                     | 14.30 ± 7.65       | 12.65 (8.61–18.38) *  | 0.273              |
|                                     | Animal iron (mg)    | 43.9                                     | 7.86 ± 5.59        | 6.35 (3.86–10.46) *   | 40.55                                    | 6.91 ± 4.93        | 5.43 (3.49–9.63) *    | 0.014              |
|                                     | Plant iron (mg)     | 56.1                                     | 10.06 ± 5.99       | 8.79 (5.74–12.66) *   | 59.5                                     | 10.15 ± 6.26       | 8.34 (5.23–13.58) *   | 0.850              |
| Intake of iron from various sources | Cereals (mg)        | 24.9                                     | 4.46 ± 3.09        | 3.85 (2.29–5.76) *    | 27.0                                     | 4.61 ± 3.41        | 3.78 (2.10–6.28) *    | 0.908              |
|                                     | Meat products (mg)  | 36.1                                     | 6.47 ± 5.23        | 5.15 (2.69–8.74) *    | 31.5                                     | 5.37 ± 4.40        | 4.06 (2.05–7.50) *    | 0.002              |
|                                     | Vegetables (mg)     | 13.7                                     | 2.45 ± 2.39        | 1.91 (0.79–3.39) *    | 14.9                                     | 2.54 ± 2.38        | 1.76 (1.13–3.23) *    | 0.518              |
|                                     | Nuts (mg)           | 5.9                                      | 1.06 ± 1.54        | 0.72 (0.04–1.45) *    | 6.1                                      | 1.03 ± 1.60        | 0.72 (0.00–1.36) *    | 0.829              |
|                                     | Fruit (mg)          | 4.0                                      | 0.72 ± 0.68        | 0.55 (0.28–0.92) *    | 3.9                                      | 0.67 ± 0.70        | 0.46 (0.28–0.83) *    | 0.010              |
|                                     | Cocoa products (mg) | 3.6                                      | 0.64 ± 0.68        | 0.45 (0.21–0.82) *    | 3.3                                      | 0.57 ± 0.72        | 0.33 (0.15–0.75) *    | 0.001              |
|                                     | Eggs (mg)           | 4.7                                      | 0.84 ± 0.85        | 0.63 (0.31–0.94) *    | 5.9                                      | 1.01 ± 1.08        | 0.63 (0.31–1.26) *    | 0.032              |
|                                     | Potatoes (mg)       | 3.1                                      | 0.55 ± 0.62        | 0.36 (0.21–0.64) *    | 3.2                                      | 0.55 ± 0.59        | 0.36 (0.21–0.68) *    | 0.901              |
|                                     | Dairy products (mg) | 2.0                                      | 0.35 ± 0.26        | 0.28 (0.18–0.44) *    | 2.1                                      | 0.35 ± 0.30        | 0.27 (0.16–0.47) *    | 0.247              |
| Fat (mg)                            | 0.9                 | 0.17 ± 0.22                              | 0.11 (0.06–0.20) * | 1.0                   | 0.18 ± 0.23                              | 0.11 (0.06–0.20) * | 0.829                 |                    |
| Fish products (mg)                  | 1.2                 | 0.20 ± 0.28                              | 0.13 (0.06–0.22) * | 1.0                   | 0.18 ± 0.26                              | 0.06 (0.00–0.22) * | 0.095                 |                    |

\* Nonparametric distribution (verified using Shapiro–Wilk test;  $p \leq 0.05$ ), \*\* compared using Mann–Whitney U test (due to nonparametric distribution).

**Supplementary Table S2.** Comparison of the intake of various forms of iron along with that of iron intake from various sources in the national sample of Polish male adolescents, in the sub-groups of underweight, proper body mass, and overweight male respondents.

| Intake of iron                      |                     | Underweight male respondents<br>( <i>n</i> = 54) |                                 |                                  | Proper body mass male respondents<br>( <i>n</i> = 708) |                                 |                                 | Overweight male respondents<br>( <i>n</i> = 263) |                                  |                                  | <i>p</i> -Value<br>** |
|-------------------------------------|---------------------|--------------------------------------------------|---------------------------------|----------------------------------|--------------------------------------------------------|---------------------------------|---------------------------------|--------------------------------------------------|----------------------------------|----------------------------------|-----------------------|
|                                     |                     | Intake (%)                                       | Mean ± SD                       | Median (25th–75th)               | Intake (%)                                             | Mean ± SD                       | Median (25th–75th)              | Intake (%)                                       | Mean ± SD                        | Median (25th–75th)               |                       |
| Intake of various forms of iron     | Total iron (mg)     | 100                                              | 17.16 ± 9.65                    | 14.46 (10.70–21.27) *            | 100                                                    | 17.82 ± 9.20                    | 15.74 (11.05–22.77) *           | 100                                              | 17.33 ± 9.15                     | 15.29 (10.83–22.50) *            | 0.551                 |
|                                     | Heme-iron (mg)      | 16.0                                             | 2.74 ± 1.96                     | 2.59 (1.16–3.29) *               | 16.9                                                   | 3.02 ± 2.09                     | 2.47 (1.51–4.17) *              | 18.0                                             | 3.12 ± 2.40                      | 2.32 (1.49–3.98) *               | 0.656                 |
|                                     | Non-heme iron (mg)  | 84.0                                             | 14.42 ± 8.19                    | 12.61 (8.14–17.36) *             | 83.1                                                   | 14.80 ± 7.71                    | 12.91 (9.20–18.87) *            | 82.0                                             | 14.21 ± 7.38                     | 12.61 (8.76–18.31) *             | 0.571                 |
|                                     | Animal iron (mg)    | 39.9                                             | 6.85 ± 4.91                     | 6.48 (2.90–8.23) *               | 42.4                                                   | 7.55 ± 5.23                     | 6.17 (3.77–10.43) *             | 45.0                                             | 7.80 ± 5.99                      | 5.80 (3.71–9.95) *               | 0.656                 |
|                                     | Plant iron (mg)     | 60.1                                             | 10.31 ± 6.51                    | 9.15 (5.71–12.30) *              | 57.6                                                   | 10.27 ± 6.17                    | 8.80 (5.56–13.25) *             | 55.0                                             | 9.54 ± 5.66                      | 8.21 (5.69–11.60) *              | 0.339                 |
| Intake of iron from various sources | Cereals (mg)        | 28.3                                             | 4.85 ± 3.47                     | 4.41 (1.98–6.90) *               | 36.2                                                   | 4.64 ± 3.28                     | 3.86 (2.34–6.04) *              | 23.5                                             | 4.08 ± 2.82                      | 3.46 (2.12–5.31) *               | 0.053                 |
|                                     | Meat products (mg)  | 33.1                                             | 5.68 ± 4.47                     | 5.33 (2.41–7.17) *               | 34.1                                                   | 6.07 ± 4.84                     | 4.75 (2.49–8.42) *              | 37.2                                             | 6.44 ± 5.58                      | 4.58 (2.65–8.23) *               | 0.896                 |
|                                     | Vegetables (mg)     | 14.1                                             | 2.42 ± 2.91                     | 1.59 (0.51–3.23) *               | 13.8                                                   | 2.46 ± 2.38                     | 1.76 (0.94–3.23) *              | 14.7                                             | 2.54 ± 2.27                      | 2.07 (1.13–3.39) *               | 0.367                 |
|                                     | Nuts (mg)           | 4.4                                              | 0.76 ± 0.99                     | 0.37 (0.00–1.22) *               | 5.9                                                    | 1.06 ± 1.64                     | 0.72 (0.00–1.45) *              | 6.3                                              | 1.09 ± 1.40                      | 0.72 (0.18–1.45) *               | 0.061                 |
|                                     | Fruit (mg)          | 4.4                                              | 0.75 ± 0.76                     | 0.42 (0.28–0.92) *               | 3.9                                                    | 0.69 ± 0.68                     | 0.46 (0.28–0.92) *              | 4.1                                              | 0.72 ± 0.68                      | 0.55 (0.28–0.92) *               | 0.877                 |
|                                     | Cocoa products (mg) | 3.8                                              | 0.66 ± 0.74                     | 0.53 (0.18–0.89) * <sup>AB</sup> | 3.7                                                    | 0.66 ± 0.75                     | 0.45 (0.21–0.88) * <sup>A</sup> | 2.8                                              | 0.49 ± 0.46                      | 0.36 (0.21–0.63) * <sup>B</sup>  | 0.020                 |
|                                     | Eggs (mg)           | 3.9                                              | 0.67 ± 0.83                     | 0.47 (0.31–0.79) * <sup>A</sup>  | 5.2                                                    | 0.92 ± 0.94                     | 0.63 (0.31–1.10) * <sup>B</sup> | 4.8                                              | 0.84 ± 0.91                      | 0.63 (0.31–0.94) * <sup>AB</sup> | 0.007                 |
|                                     | Potatoes (mg)       | 3.9                                              | 0.66 ± 0.77                     | 0.36 (0.21–0.70) *               | 3.2                                                    | 0.57 ± 0.65                     | 0.36 (0.21–0.63) *              | 2.7                                              | 0.47 ± 0.42                      | 0.36 (0.21–0.57) *               | 0.307                 |
|                                     | Dairy products (mg) | 2.2                                              | 0.38 ± 0.27                     | 0.29 (0.21–0.47) *               | 2.0                                                    | 0.36 ± 0.28                     | 0.28 (0.18–0.44) *              | 1.9                                              | 0.33 ± 0.27                      | 0.26 (0.17–0.41) *               | 0.210                 |
|                                     | Fat (mg)            | 1.2                                              | 0.20 ± 0.24                     | 0.14 (0.06–0.22) *               | 1.1                                                    | 0.18 ± 0.23                     | 0.11 (0.06–0.20) *              | 0.9                                              | 0.15 ± 0.19                      | 0.10 (0.06–0.17) *               | 0.283                 |
| Fish products (mg)                  | 0.7                 | 0.13 ± 0.20                                      | 0.06 (0.00–0.19) * <sup>A</sup> | 1.0                              | 0.20 ± 0.28                                            | 0.13 (0.06–0.22) * <sup>B</sup> | 1.1                             | 0.19 ± 0.25                                      | 0.13 (0.00–0.22) * <sup>AB</sup> | 0.030                            |                       |

\* Nonparametric distribution (verified using Shapiro–Wilk test;  $p \leq 0.05$ ), \*\* Compared using Kruskal–Wallis analysis of variance (ANOVA) (due to nonparametric distribution), values with different letters (A, B) differ in rows.

**Supplementary Table S3.** Comparison of the intake of various forms of iron along with that of iron intake from various sources in the national sample of Polish male adolescents, in the sub-groups of anemic and non-anemic history male respondents.

| Intake of iron                      |                     | Anemic history male respondents<br>( <i>n</i> = 41) |                    |                       | Non-anemic history male respondents<br>( <i>n</i> = 984) |                    |                       | <i>p</i> -Value ** |
|-------------------------------------|---------------------|-----------------------------------------------------|--------------------|-----------------------|----------------------------------------------------------|--------------------|-----------------------|--------------------|
|                                     |                     | Intake (%)                                          | Mean ± SD          | Median (25th–75th)    | Intake (%)                                               | Mean ± SD          | Median (25th–75th)    |                    |
| Intake of various forms of iron     | Total iron (mg)     | 100                                                 | 17.82 ± 9.29       | 15.05 (10.97–22.52) * | 100                                                      | 17.66 ± 9.21       | 15.59 (11.00–22.50) * | 0.847              |
|                                     | Heme-iron (mg)      | 16.8                                                | 3.00 ± 2.30        | 2.42 (1.48–4.05) *    | 17.2                                                     | 3.03 ± 2.16        | 2.44 (1.48–4.03) *    | 0.705              |
|                                     | Non-heme iron (mg)  | 83.2                                                | 14.82 ± 7.58       | 13.72 (9.05–18.71) *  | 82.8                                                     | 14.62 ± 7.66       | 12.77 (9.08–18.72) *  | 0.951              |
|                                     | Animal iron (mg)    | 42.1                                                | 7.51 ± 5.74        | 6.06 (3.69–10.12) *   | 42.9                                                     | 7.58 ± 5.40        | 6.10 (3.71–10.09) *   | 0.705              |
|                                     | Plant iron (mg)     | 57.9                                                | 10.31 ± 5.83       | 9.15 (5.67–12.99) *   | 57.1                                                     | 10.08 ± 6.08       | 8.67 (5.67–12.93) *   | 0.823              |
| Intake of iron from various sources | Cereals (mg)        | 24.8                                                | 4.42 ± 3.07        | 3.89 (2.25–5.97) *    | 25.5                                                     | 4.51 ± 3.19        | 3.80 (2.25–6.01) *    | 0.884              |
|                                     | Meat products (mg)  | 34.2                                                | 6.10 ± 5.38        | 4.55 (2.53–8.21) *    | 34.8                                                     | 6.15 ± 5.01        | 4.75 (2.56–8.10) *    | 0.703              |
|                                     | Vegetables (mg)     | 16.2                                                | 2.89 ± 2.65        | 2.26 (0.96–3.39) *    | 13.9                                                     | 2.46 ± 2.37        | 1.76 (0.94–3.39) *    | 0.356              |
|                                     | Nuts (mg)           | 4.7                                                 | 0.83 ± 1.07        | 0.45 (0.00–1.45) *    | 6.0                                                      | 1.06 ± 1.57        | 0.72 (0.00–1.45) *    | 0.209              |
|                                     | Fruit (mg)          | 4.3                                                 | 0.76 ± 1.00        | 0.56 (0.28–0.92) *    | 4.0                                                      | 0.70 ± 0.67        | 0.46 (0.28–0.92) *    | 0.741              |
|                                     | Cocoa products (mg) | 3.6                                                 | 0.64 ± 0.72        | 0.45 (0.21–0.78) *    | 3.5                                                      | 0.62 ± 0.69        | 0.42 (0.21–0.76) *    | 0.830              |
|                                     | Eggs (mg)           | 4.9                                                 | 0.87 ± 0.87        | 0.55 (0.31–1.10) *    | 5.0                                                      | 0.89 ± 0.93        | 0.63 (0.31–1.10) *    | 0.580              |
|                                     | Potatoes (mg)       | 3.3                                                 | 0.59 ± 0.80        | 0.36 (0.21–0.64) *    | 3.1                                                      | 0.55 ± 0.60        | 0.36 (0.21–0.64) *    | 0.463              |
|                                     | Dairy products (mg) | 1.7                                                 | 0.30 ± 0.22        | 0.25 (0.18–0.44) *    | 2.0                                                      | 0.35 ± 0.28        | 0.28 (0.18–0.44) *    | 0.162              |
| Fat (mg)                            | 0.1                 | 0.19 ± 0.20                                         | 0.11 (0.06–0.20) * | 1.0                   | 0.17 ± 0.22                                              | 0.11 (0.06–0.20) * | 0.216                 |                    |
| Fish products (mg)                  | 1.3                 | 0.24 ± 0.30                                         | 0.13 (0.00–0.22) * | 1.1                   | 0.19 ± 0.27                                              | 0.13 (0.00–0.22) * | 0.533                 |                    |

\* Nonparametric distribution (verified using Shapiro–Wilk test;  $p \leq 0.05$ ), \*\* Compared using Mann–Whitney U test (due to nonparametric distribution).

**Supplementary Table S4.** Comparison of the intake of various forms of iron along with that of iron intake from various sources in the national sample of Polish male adolescents, in the sub-groups of vegetarian and non-vegetarian male respondents.

| Intake of iron                      |                     | Vegetarian male respondents ( <i>n</i> = 26) |                    |                      | Non-vegetarian male respondents ( <i>n</i> = 999) |                    |                       | <i>p</i> -Value ** |
|-------------------------------------|---------------------|----------------------------------------------|--------------------|----------------------|---------------------------------------------------|--------------------|-----------------------|--------------------|
|                                     |                     | Intake (%)                                   | Mean ± SD          | Median (25th–75th)   | Intake (%)                                        | Mean ± SD          | Median (25th–75th)    |                    |
| Intake of various forms of iron     | Total iron (mg)     | 100                                          | 14.68 ± 10.18      | 13.23 (4.22–22.80) * | 100                                               | 17.74 ± 9.17       | 15.62 (11.01–22.53) * | 0.051              |
|                                     | Heme-iron (mg)      | 13.0                                         | 1.91 ± 2.19        | 1.03 (0.65–2.43) *   | 17.2                                              | 3.06 ± 2.16        | 2.47 (1.52–4.07) *    | 0.001              |
|                                     | Non-heme iron (mg)  | 87.0                                         | 12.77 ± 8.61       | 12.17 (3.63–22.18) * | 82.8                                              | 14.68 ± 7.62       | 12.80 (9.15–18.69) *  | 0.176              |
|                                     | Animal iron (mg)    | 32.4                                         | 4.76 ± 5.47        | 2.57 (1.63–6.08) *   | 43.1                                              | 7.65 ± 5.40        | 6.17 (3.80–10.17) *   | 0.001              |
|                                     | Plant iron (mg)     | 67.6                                         | 9.92 ± 6.89        | 10.27 (2.80–12.61) * | 56.9                                              | 10.09 ± 6.05       | 8.67 (5.68–12.99) *   | 0.898              |
| Intake of iron from various sources | Cereals (mg)        | 25.5                                         | 3.84 ± 3.08        | 3.59 (1.22–5.21) *   | 25.5                                              | 4.52 ± 3.19        | 3.80 (2.27–6.02) *    | 0.226              |
|                                     | Meat products (mg)  | 35.0                                         | 3.60 ± 4.93        | 2.08 (0.60–3.72) *   | 35.0                                              | 6.21 ± 5.01        | 4.84 (2.60–8.27) *    | 0.001              |
|                                     | Vegetables (mg)     | 13.9                                         | 2.88 ± 2.63        | 2.26 (1.01–4.47) *   | 13.9                                              | 2.47 ± 2.38        | 1.76 (0.96–3.31) *    | 0.461              |
|                                     | Nuts (mg)           | 5.9                                          | 1.44 ± 2.49        | 0.73 (0.00–1.95) *   | 5.9                                               | 1.04 ± 1.52        | 0.72 (0.00–1.45) *    | 0.771              |
|                                     | Fruit (mg)          | 4.0                                          | 0.71 ± 1.01        | 0.37 (0.21–0.85) *   | 4.0                                               | 0.70 ± 0.68        | 0.46 (0.28–0.92) *    | 0.199              |
|                                     | Cocoa products (mg) | 3.5                                          | 0.53 ± 0.44        | 0.42 (0.28–0.60) *   | 3.5                                               | 0.62 ± 0.70        | 0.42 (0.21–0.79) *    | 0.987              |
|                                     | Eggs (mg)           | 5.0                                          | 0.68 ± 0.74        | 0.47 (0.20–0.79) *   | 5.0                                               | 0.89 ± 0.93        | 0.63 (0.31–1.10) *    | 0.091              |
|                                     | Potatoes (mg)       | 3.1                                          | 0.39 ± 0.44        | 0.25 (0.14–0.46) *   | 3.1                                               | 0.56 ± 0.61        | 0.36 (0.21–0.64) *    | 0.026              |
|                                     | Dairy products (mg) | 2.0                                          | 0.30 ± 0.27        | 0.23 (0.16–0.31) *   | 2.0                                               | 0.35 ± 0.28        | 0.28 (0.18–0.44) *    | 0.158              |
| Fat (mg)                            | 0.8                 | 0.12 ± 0.11                                  | 0.09 (0.04–0.14) * | 1.0                  | 0.18 ± 0.22                                       | 0.11 (0.06–0.20) * | 0.163                 |                    |
| Fish products (mg)                  | 1.2                 | 0.17 ± 0.40                                  | 0.06 (0.00–0.18) * | 1.1                  | 0.20 ± 0.27                                       | 0.13 (0.04–0.22) * | 0.058                 |                    |

\* Nonparametric distribution (verified using Shapiro–Wilk test;  $p \leq 0.05$ ), \*\* Compared using Mann–Whitney U test (due to nonparametric distribution).

**Supplementary Table S5.** Comparison of the intake of various forms of iron along with that of iron intake from various sources in the national sample of Polish male adolescents, in the sub-groups of male respondents not applying and applying iron supplementation.

| Intake of iron                      |                     | Male respondents not applying iron supplementation ( <i>n</i> = 902) |                    |                       | Male respondents applying iron supplementation ( <i>n</i> = 123) |                    |                       | <i>p</i> -Value ** |
|-------------------------------------|---------------------|----------------------------------------------------------------------|--------------------|-----------------------|------------------------------------------------------------------|--------------------|-----------------------|--------------------|
|                                     |                     | Intake (%)                                                           | Mean ± SD          | Median (25th–75th)    | Intake (%)                                                       | Mean ± SD          | Median (25th–75th)    |                    |
| Intake of various forms of iron     | Total iron (mg)     | 100                                                                  | 17.25 ± 7.34       | 15.13 (10.67–21.97) * | 100                                                              | 20.65 ± 9.79       | 19.70 (13.28–27.32) * | 0.001              |
|                                     | Heme-iron (mg)      | 17.2                                                                 | 2.96 ± 1.55        | 2.36 (1.43–3.93) *    | 17.0                                                             | 3.52 ± 2.14        | 3.26 (1.96–4.52) *    | 0.001              |
|                                     | Non-heme iron (mg)  | 82.8                                                                 | 14.29 ± 6.39       | 12.52 (8.82–18.03) *  | 83.0                                                             | 17.13 ± 8.34       | 15.67 (11.34–22.79) * | 0.001              |
|                                     | Animal iron (mg)    | 43.0                                                                 | 7.41 ± 3.97        | 5.89 (3.58–9.83) *    | 42.7                                                             | 8.81 ± 5.36        | 8.15 (4.91–11.30) *   | 0.001              |
|                                     | Plant iron (mg)     | 57.0                                                                 | 9.85 ± 5.45        | 8.54 (5.57–12.62) *   | 57.3                                                             | 11.84 ± 6.91       | 10.30 (6.55–15.13) *  | 0.002              |
| Intake of iron from various sources | Cereals (mg)        | 25.6                                                                 | 4.41 ± 2.41        | 3.76 (2.20–5.94) *    | 2.2                                                              | 5.21 ± 4.12        | 4.43 (2.83–6.47) *    | 0.046              |
|                                     | Meat products (mg)  | 35.0                                                                 | 6.05 ± 3.63        | 4.58 (2.35–8.01) *    | 33.2                                                             | 6.85 ± 4.96        | 5.71 (3.33–9.32) *    | 0.018              |
|                                     | Vegetables (mg)     | 13.9                                                                 | 2.40 ± 2.11        | 1.60 (0.94–3.23) *    | 14.7                                                             | 3.05 ± 2.61        | 2.41 (1.26–3.70) *    | 0.002              |
|                                     | Nuts (mg)           | 5.9                                                                  | 1.02 ± 1.60        | 0.72 (0.00–1.45) *    | 6.2                                                              | 1.29 ± 1.74        | 0.72 (0.37–1.53) *    | 0.018              |
|                                     | Fruit (mg)          | 3.8                                                                  | 0.66 ± 0.73        | 0.46 (0.28–0.83) *    | 4.8                                                              | 1.00 ± 1.00        | 0.65 (0.46–1.20) *    | 0.001              |
|                                     | Cocoa products (mg) | 3.5                                                                  | 0.61 ± 0.59        | 0.42 (0.21–0.76) *    | 3.2                                                              | 0.65 ± 0.74        | 0.45 (0.21–0.83) *    | 0.491              |
|                                     | Eggs (mg)           | 4.8                                                                  | 0.84 ± 0.53        | 0.63 (0.31–0.94) *    | 6.2                                                              | 1.27 ± 1.29        | 0.79 (0.47–1.57) *    | 0.001              |
|                                     | Potatoes (mg)       | 3.3                                                                  | 0.56 ± 0.38        | 0.36 (0.21–0.64) *    | 2.3                                                              | 0.47 ± 0.37        | 0.36 (0.21–0.50) *    | 0.077              |
|                                     | Dairy products (mg) | 2.1                                                                  | 0.34 ± 0.20        | 0.28 (0.18–0.43) *    | 2.2                                                              | 0.45 ± 0.36        | 0.32 (0.20–0.58) *    | 0.001              |
| Fat (mg)                            | 1.0                 | 0.17 ± 0.15                                                          | 0.11 (0.06–0.20) * | 0.9                   | 0.18 ± 0.29                                                      | 0.09 (0.06–0.20) * | 0.102                 |                    |
| Fish products (mg)                  | 1.1                 | 0.19 ± 0.17                                                          | 0.13 (0.01–0.22) * | 1.1                   | 0.23 ± 0.29                                                      | 0.15 (0.03–0.32) * | 0.042                 |                    |

\* Nonparametric distribution (verified using Shapiro–Wilk test;  $p \leq 0.05$ ), \*\* Compared using Mann–Whitney U test (due to nonparametric distribution).

**Supplementary Table S6.** Comparison of the intake of various forms of iron along with that of iron intake from various sources in the national sample of Polish male adolescents, in the sub-groups of male respondents from technical and comprehensive schools.

| Intake of iron                      |                     | Male respondents from technical schools ( <i>n</i> =234) |                    |                       | Male respondents from comprehensive schools ( <i>n</i> = 791) |                    |                       | <i>p</i> -Value ** |
|-------------------------------------|---------------------|----------------------------------------------------------|--------------------|-----------------------|---------------------------------------------------------------|--------------------|-----------------------|--------------------|
|                                     |                     | Intake (%)                                               | Mean ± SD          | Median (25th–75th)    | Intake (%)                                                    | Mean ± SD          | Median (25th–75th)    |                    |
| Intake of various forms of iron     | Total iron (mg)     | 100                                                      | 17.56 ± 9.16       | 15.51 (10.87–22.47) * | 100                                                           | 13.63 ± 7.54       | 12.19 (11.26–23.39) * | 0.721              |
|                                     | Heme-iron (mg)      | 15.7                                                     | 2.76 ± 2.25        | 2.07 (1.10–3.81) *    | 15.1                                                          | 2.06 ± 1.80        | 1.50 (1.21–3.88) *    | 0.671              |
|                                     | Non-heme iron (mg)  | 84.3                                                     | 14.81 ± 7.55       | 12.99 (9.30–19.10) *  | 84.9                                                          | 11.59 ± 6.29       | 10.79 (9.68–18.82) *  | 0.718              |
|                                     | Animal iron (mg)    | 39.2                                                     | 6.89 ± 5.62        | 5.19 (2.74–9.52) *    | 37.9                                                          | 5.16 ± 4.49        | 3.75 (3.02–9.70) *    | 0.671              |
|                                     | Plant iron (mg)     | 60.8                                                     | 10.67 ± 5.98       | 9.36 (6.38–13.51) *   | 62.1                                                          | 8.55 ± 5.08        | 7.69 (6.68–13.04) *   | 0.881              |
| Intake of iron from various sources | Cereals (mg)        | 26.2                                                     | 4.60 ± 2.96        | 3.89 (2.83–6.47) *    | 25.3                                                          | 3.67 ± 2.68        | 3.19 (2.39–5.61) *    | 0.310              |
|                                     | Meat products (mg)  | 31.7                                                     | 5.56 ± 5.18        | 3.93 (3.33–9.32) *    | 31.8                                                          | 5.70 ± 5.27        | 3.96 (1.76–8.03) *    | 0.708              |
|                                     | Vegetables (mg)     | 15.2                                                     | 2.67 ± 2.33        | 2.10 (1.26–3.70) *    | 15.6                                                          | 2.23 ± 2.21        | 1.68 (1.13–3.54) *    | 0.410              |
|                                     | Nuts (mg)           | 7.4                                                      | 1.29 ± 1.62        | 0.73 (0.37–1.53) *    | 7.6                                                           | 1.00 ± 1.50        | 0.72 (0.18–1.81) *    | 0.525              |
|                                     | Fruit (mg)          | 4.7                                                      | 0.82 ± 0.74        | 0.65 (0.46–1.20) *    | 4.5                                                           | 0.67 ± 0.70        | 0.46 (0.37–0.93) *    | 0.394              |
|                                     | Cocoa products (mg) | 3.6                                                      | 0.63 ± 0.67        | 0.42 (0.21–0.83) *    | 3.8                                                           | 0.51 ± 0.58        | 0.36 (0.21–0.87) *    | 0.848              |
|                                     | Eggs (mg)           | 4.6                                                      | 0.81 ± 0.90        | 0.63 (0.47–1.57) *    | 4.5                                                           | 0.62 ± 0.69        | 0.47 (0.31–0.94) *    | 0.842              |
|                                     | Potatoes (mg)       | 2.8                                                      | 0.50 ± 0.54        | 0.36 (0.21–0.50) *    | 3.0                                                           | 0.42 ± 0.49        | 0.29 (0.21–0.57) *    | 0.749              |
|                                     | Dairy products (mg) | 2.0                                                      | 0.34 ± 0.26        | 0.28 (0.20–0.50) *    | 1.9                                                           | 0.29 ± 0.23        | 0.24 (0.18–0.44) *    | 0.771              |
| Fat (mg)                            | 1.0                 | 0.17 ± 0.19                                              | 0.11 (0.06–0.20) * | 1.0                   | 0.13 ± 0.17                                                   | 0.09 (0.06–0.20) * | 0.552                 |                    |
| Fish products (mg)                  | 1.0                 | 0.17 ± 0.25                                              | 0.13 (0.03–0.32) * | 1.0                   | 0.14 ± 0.23                                                   | 0.06 (0.06–0.22) * | 0.404                 |                    |

\* Nonparametric distribution (verified using Shapiro–Wilk test;  $p \leq 0.05$ ), \*\* Compared using Mann–Whitney U test (due to nonparametric distribution).

**Supplementary Table S7.** Share of individuals characterized by adequate or inadequate iron intake.

| Variable                      | Sub-groups                              | <RDA *      | >RDA *      | <i>p</i> -Value ** |
|-------------------------------|-----------------------------------------|-------------|-------------|--------------------|
| Age                           | Minor males                             | 133 (18.4%) | 589 (81.6%) | 0.760              |
|                               | Adult males                             | 59 (19.5%)  | 244 (80.5%) |                    |
| Body mass index               | Underweight males                       | 12 (22.2%)  | 42 (77.8%)  | 0.309              |
|                               | Proper body mass males                  | 128 (18.1%) | 580 (81.9%) |                    |
|                               | Overweight males                        | 44 (16.7%)  | 219 (83.3%) |                    |
| Anemia history                | Non-anemic males                        | 164 (16.7%) | 820 (83.3%) | 0.588              |
|                               | Anemic males                            | 5 (12.2%)   | 36 (87.8%)  |                    |
| Following vegetarian diet     | Non-vegetarian males                    | 160 (16.0%) | 839 (84.0%) | 1.000              |
|                               | Vegetarian males                        | 4 (15.4%)   | 22 (84.6%)  |                    |
| Applying iron supplementation | Males not applying iron supplementation | 152 (16.9%) | 750 (83.1%) | 0.874              |
|                               | Males applying iron supplementation     | 22 (17.9%)  | 101 (82.1%) |                    |
| Type of school                | Males from comprehensive schools        | 34 (14.5%)  | 200 (85.5%) | 0.739              |
|                               | Males from technical schools            | 106 (13.4%) | 685 (86.6%) |                    |

\* RDA (recommended dietary allowance; for males aged 15–18—11 mg, males aged 19–20—8 mg [21]), \*\* Compared using chi<sup>2</sup> test.
